# Supplementary material
Source: PubMed Central journal article supplement (PMC4399072)
Supplement: IAI.02869-14_zii999091220so1.pdf [file IAI.02869-14_zii999091220so1.pdf]

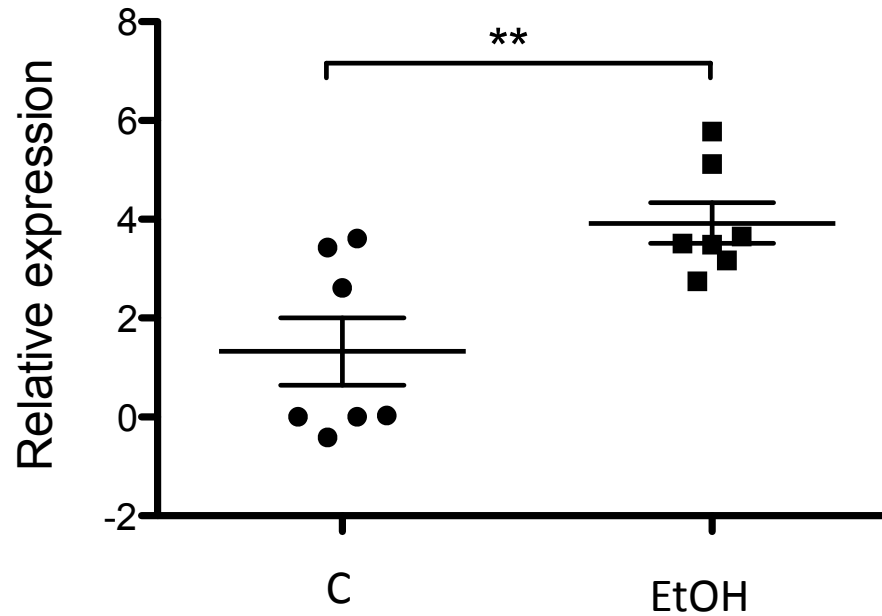

Figure S1: A) Relative expression of *cpsA* pneumococcal gene in sucrose control group (C) versus ethanol (EtOH) group in monkey BAL cell pellets at Day 1 post pneumococcal infection. Relative abundance of *cpsA* bacterial gene is compared to relative abundance in macaques bronchial cells by GAPDH. \*\*  $p < 0.01$ .

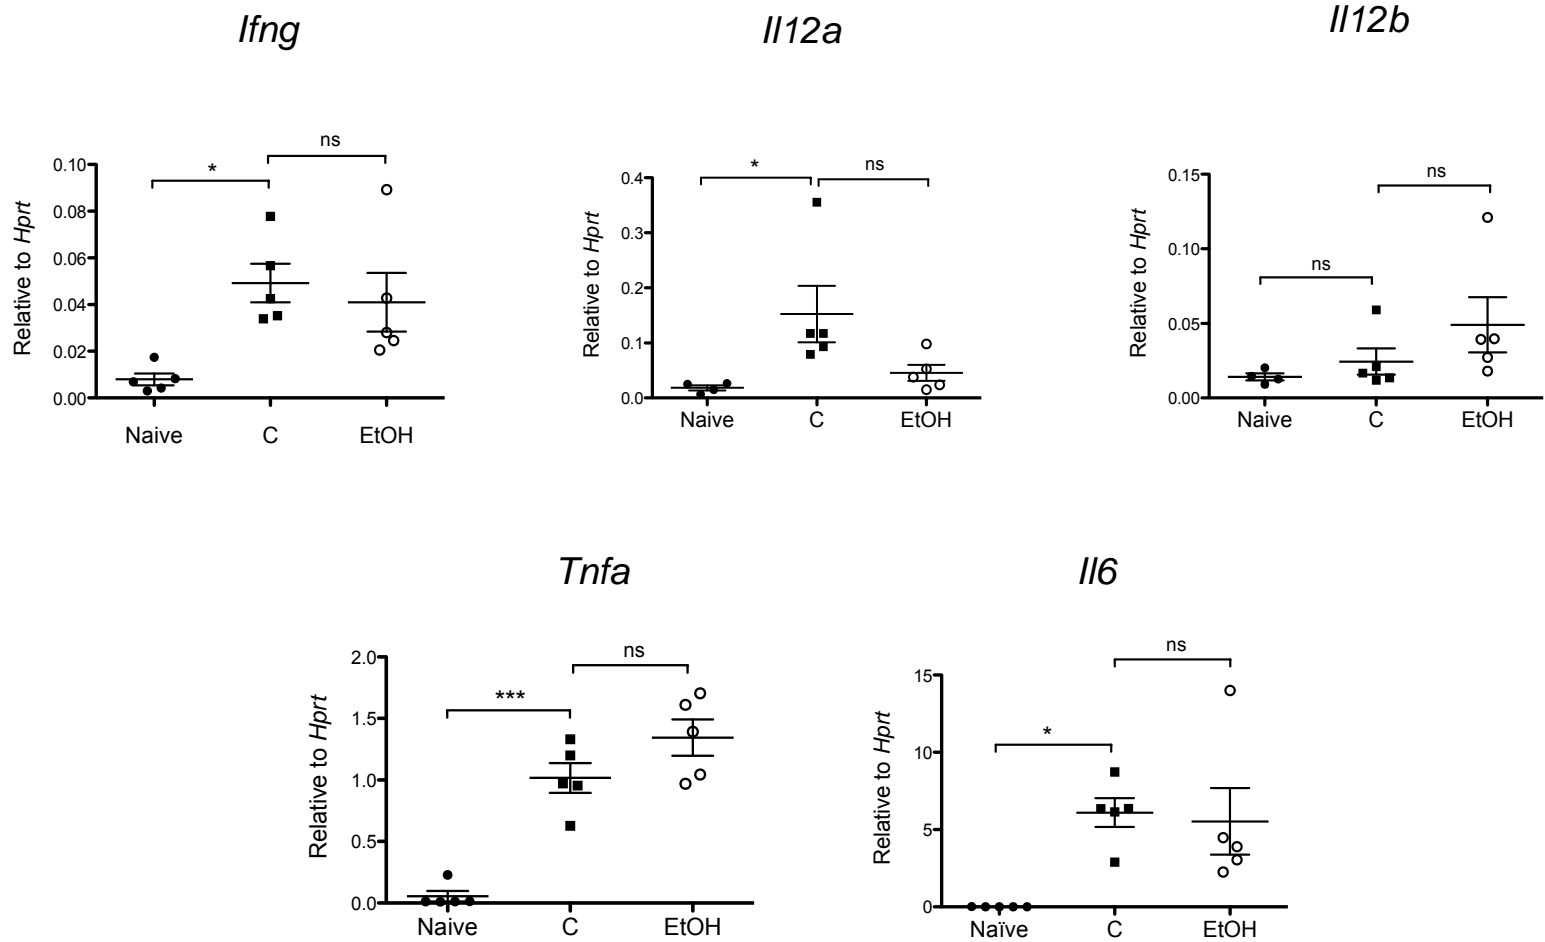

Figure S2: Expression of genes unrelated to IL-17 at 5 hours post infection. Each circle, square and empty circle represents one mouse. Naïve: uninfected mice, C: control group, EtOH: ethanol group. \* P < 0.05, \*\*\* P < 0.001, ns: not significant . One-Way ANOVA).

# Ethanol group at day1 post pneumococcal infection

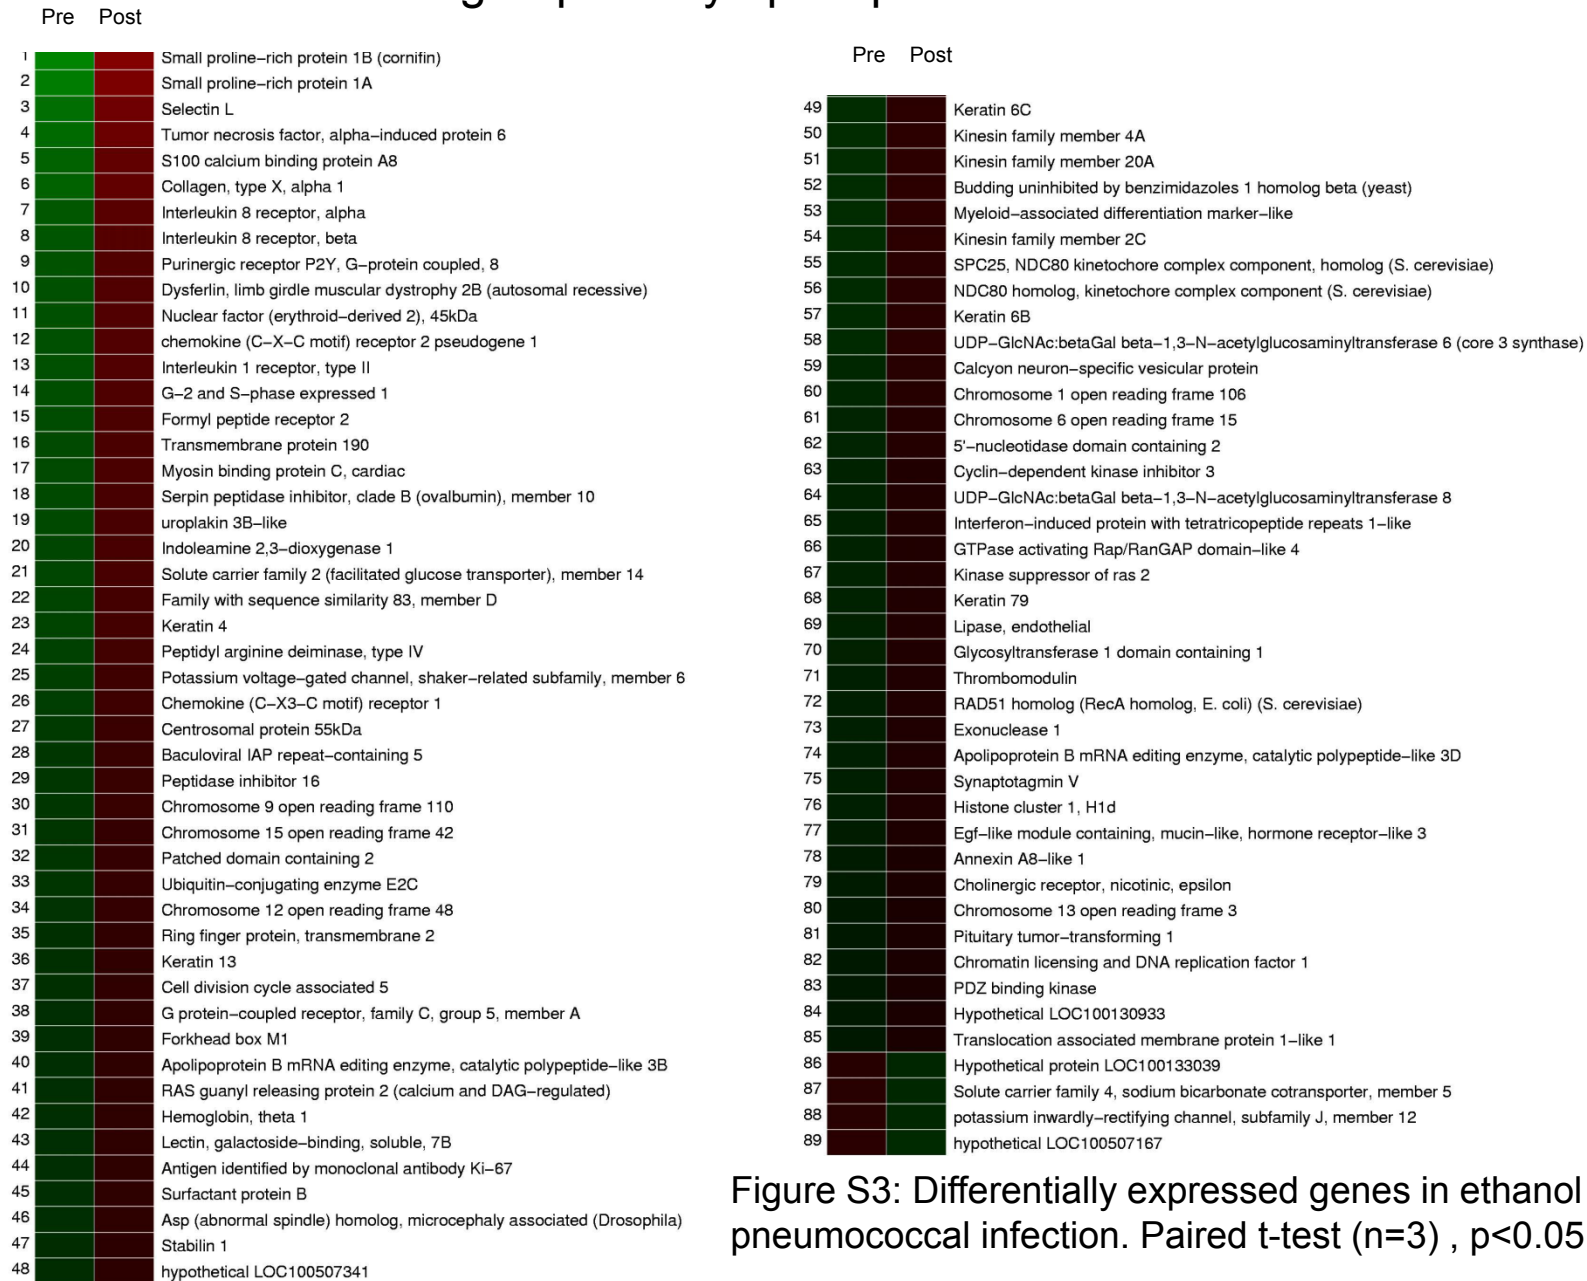

Figure S3: Differentially expressed genes in ethanol group post pneumococcal infection. Paired t-test (n=3) , p<0.05

Table S1: KEGG pathway in Ethanol group at day1 post pneumococcal infection

| Pathway                                                           | List     | Totals<br>Gene Set | Z-SCORE     |
|-------------------------------------------------------------------|----------|--------------------|-------------|
| <b>Chemokine signaling pathway</b>                                | <b>4</b> | <b>189</b>         | <b>3.71</b> |
| <b>Chemokine (C-X3-C motif) receptor 1</b>                        |          |                    |             |
| <b>Interleukin 8 receptor, alpha</b>                              |          |                    |             |
| <b>Interleukin 8 receptor, beta</b>                               |          |                    |             |
| <b>RAS guanyl releasing protein 2 (calcium and DAG-regulated)</b> |          |                    |             |
| Cytokine-cytokine receptor interaction                            | 4        | 275                | 2.75        |
| Amoebiasis                                                        | 2        | 105                | 2.40        |
| Cell cycle                                                        | 2        | 125                | 2.09        |
| Epithelial cell signaling in Helicobacter pylori infection        | 2        | 68                 | 3.27        |
| African trypanosomiasis                                           | 1        | 35                 | 2.26        |
| Homologous recombination                                          | 1        | 28                 | 2.61        |
| Mismatch repair                                                   | 1        | 23                 | 2.94        |
| Mucin type O-Glycan biosynthesis                                  | 1        | 30                 | 2.50        |

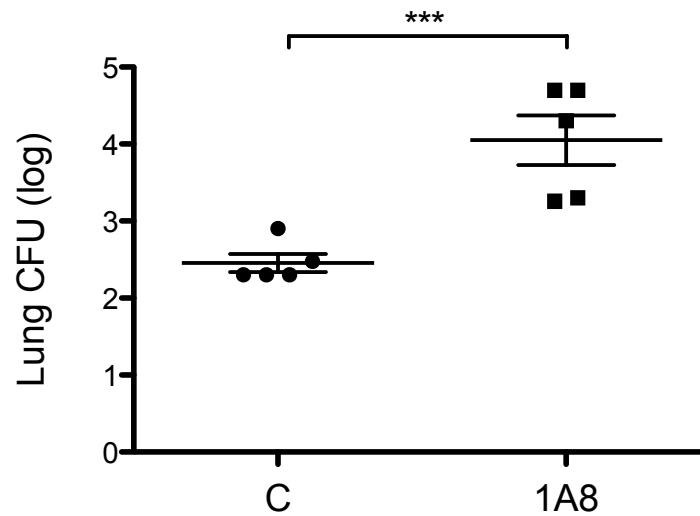

Figure S4: Decreased neutrophil numbers with 1A8 antibody impairs *S. pneumoniae* 19F clearance at 24 hours post infection. C: control group, 1A8: group that received 1A8 antibody 8 hours before infection. Each circle and square represents a mouse. \*\*\*  $P < 0.001$  (unpaired t- test)

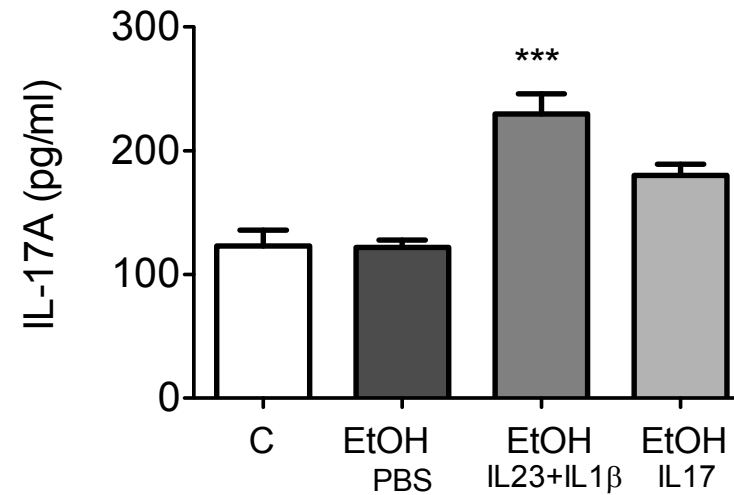

Figure S5: IL-17 A is highly expressed in cytokine rescue group at 5 hours post infection  
IL-17 A protein expression was measured in lung homogenates by ELISA at 5 hour post pneumococcal infection. Ethanol group that was rescued with IL23+IL1b and IL17 had higher IL-17A protein levels than control group. \*\*\*  $p < 0.001$  (One-Way ANOVA)

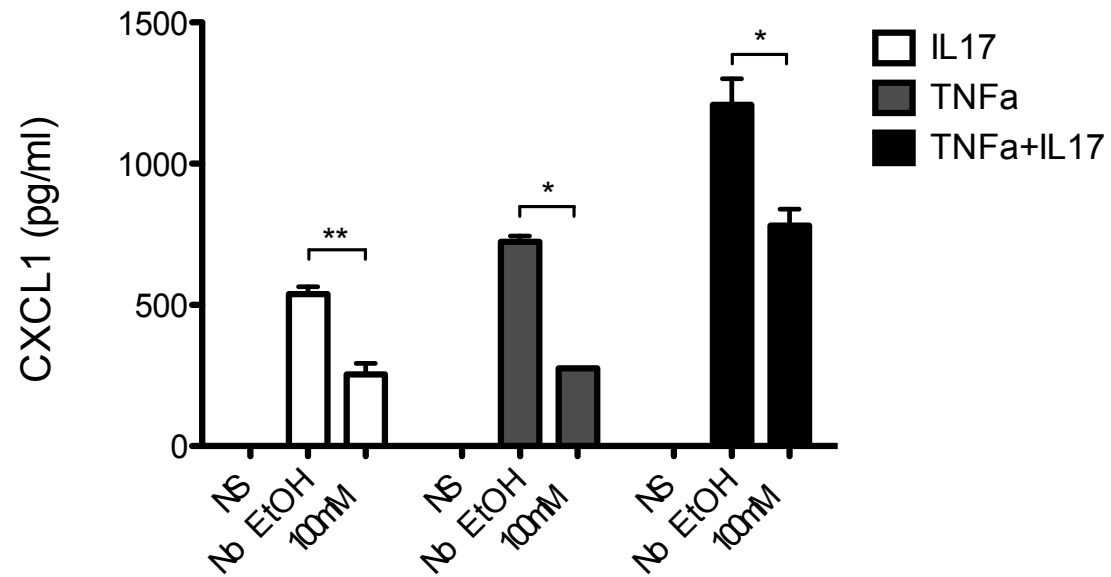

Figure S6: Alcohol decreases CXCL1 protein expression upon cytokine stimulation in HBE-1 cell line. NS: not stimulated, No EtOH: no ethanol, 100mM: 100mM of ethanol \*P< 0.05, \*\*P< 0.01, ns: not significant (One-Way ANOVA)

Table S2: IPA generated canonical pathways enriched in bronchial epithelial samples obtained from rhesus macaques on sucrose-and alcohol-fed diet.

| Ingenuity Canonical Pathways<br>Sucrose-fed R. macaques                      |               |                       |         |                                                                                                                         |
|------------------------------------------------------------------------------|---------------|-----------------------|---------|-------------------------------------------------------------------------------------------------------------------------|
|                                                                              | -log(p-value) | Ratio                 | z-score | Genes                                                                                                                   |
| Role of Pattern Recognition Receptors in Recognition of Bacteria and Viruses | 10.6          | 1.42x10 <sup>-1</sup> | 2.111   | <b>CXCL8</b> ,OAS1,C5AR1,NLRP3,C3,IL10,TLR8,TLR2,TLR4,CLEC7A,TGFB1,PIK3CG,DDX58,MAPK10,CASP1,PIK3R6,OSM,C3AR1           |
| TREM1 Signaling                                                              | 8.96          | 1.73x10 <sup>-1</sup> | 2.496   | <b>CXCL8</b> ,TREM1,NLRP3,IL10,TYROBP,TLR8,CD83,FCGR2B,TLR2,TLR4, <b>CXCL3</b> ,CASP1,ITGAX                             |
| IL-8 Signaling                                                               | 5.77          | 8.2x10 <sup>-2</sup>  | 2.324   | <b>CXCL8</b> ,HBEGF, <b>CXCR1</b> ,RHOH,EIF4EBP1,ITGB2,ITGAM, <b>CXCR2</b> ,PIK3CG,PIK3R6,MAPK10,CYBB,PTGS2,ITGAX,IRAK2 |
| Production of Nitric Oxide an Reactive Oxygen Species in Macrophages         | 5.16          | 7.78x10 <sup>-2</sup> | 2.138   | SAA4,SPI1,RHOH,APOL1,TLR2,TLR4,PIK3CG,PPP2R2B,PIK3R6,MAPK10,CYBB,S100A8,TNFRSF1B,SIRPA                                  |
| Ingenuity Canonical Pathways<br>Alcohol-fed R. macaques                      |               |                       |         |                                                                                                                         |
|                                                                              | -log(p-value) | Ratio                 | z-score | Genes                                                                                                                   |
| EIF2 Signaling                                                               | 3.57          | 9.88x10 <sup>-2</sup> | 3.162   | RPLP1,RPL3,RPLP2,RPS8,RPLP0,RPS12,PIK3R3,EIF3G,RPL8,RPL28,EIF4A1,RPS9,RPS5,RPL41,RPL13,ATM,RPSA                         |
| Gαq Signaling                                                                | 2.94          | 9.66x10 <sup>-2</sup> | 1.732   | RGS2,RGS18,ADRBK1,CSK,CHP1,GNG2,GNG3,PIK3R3,CALM1 (includes others),RND3,GNB2,PLCB3,PRKCB,ATM                           |
| ATM Signaling                                                                | 2.81          | 1.36x10 <sup>-1</sup> | 0.707   | RAD51,FANCD2,H2AFX,CREB5,CDK1,CHEK1,CCNB1,ATM                                                                           |
| Estrogen-mediated S-phase Entry                                              | 2.76          | 2.08x10 <sup>-1</sup> | 2.000   | CCNA2,CCNE1,TFDP1,CDK4,CDK1                                                                                             |



Table S3: Functional Annotation Clustering (DAVID Bioinformatics) in bronchial epithelium of sucrose- fed Rhesus macaques before and after infection with *S. pneumoniae* 19F

| Cluster 1       | Enrichment Score: 26.42                                 | Number of Genes                                                                          | P_Value  | Benjamini |
|-----------------|---------------------------------------------------------|------------------------------------------------------------------------------------------|----------|-----------|
| GOTERM_BP_FAT   | defense response                                        |  69   | 6.80E-31 | 6.80E-28  |
| GOTERM_BP_FAT   | inflammatory response                                   |  47   | 2.20E-25 | 1.50E-22  |
| GOTERM_BP_FAT   | response to wounding                                    |  58   | 3.60E-25 | 1.80E-22  |
| Cluster 2       | Enrichment Score: 13.35                                 | Number of Genes                                                                          | P_Value  | Benjamini |
| SP_PIR_KEYWORDS | disulfide bond                                          |  135  | 5.60E-23 | 1.90E-20  |
| UP_SEQ_FEATURE  | disulfide bond                                          |  130  | 1.10E-21 | 1.20E-18  |
| UP_SEQ_FEATURE  | topological domain:Extracellular                        |  120  | 2.90E-18 | 1.60E-15  |
| UP_SEQ_FEATURE  | glycosylation site:N-linked                             |  155  | 1.20E-17 | 4.20E-15  |
| SP_PIR_KEYWORDS | glycoprotein                                            |  158  | 2.80E-17 | 3.10E-15  |
| SP_PIR_KEYWORDS | signal                                                  |  130  | 2.20E-16 | 1.80E-14  |
| UP_SEQ_FEATURE  | signal peptide                                          |  130  | 2.90E-16 | 9.00E-14  |
| UP_SEQ_FEATURE  | topological domain:Cytoplasmic                          |  126  | 2.00E-13 | 4.40E-11  |
| SP_PIR_KEYWORDS | receptor                                                |  75   | 1.60E-12 | 8.80E-11  |
| SP_PIR_KEYWORDS | membrane                                                |  187  | 8.50E-12 | 4.00E-10  |
| GOTERM_CC_FAT   | plasma membrane                                         |  140  | 3.90E-11 | 8.60E-09  |
| UP_SEQ_FEATURE  | transmembrane region                                    |  151  | 1.30E-09 | 1.70E-07  |
| SP_PIR_KEYWORDS | transmembrane                                           |  151  | 2.00E-09 | 7.40E-08  |
| GOTERM_CC_FAT   | intrinsic to membrane                                   |  168  | 4.90E-07 | 5.40E-05  |
| GOTERM_CC_FAT   | integral to membrane                                    |  158  | 1.20E-05 | 5.20E-04  |
| Cluster 3       | Enrichment Score: 9.92                                  | Number of Genes                                                                          | P_Value  | Benjamini |
| INTERPRO        | Immunoglobulin subtype                                  |  36   | 1.30E-15 | 7.90E-13  |
| SMART           | IG                                                      |  36   | 1.20E-13 | 1.70E-11  |
| SP_PIR_KEYWORDS | Immunoglobulin domain                                   |  39 | 1.60E-13 | 1.00E-11  |
| INTERPRO        | Immunoglobulin                                          |  26 | 5.50E-13 | 1.60E-10  |
| INTERPRO        | Immunoglobulin-like fold                                |  42 | 9.00E-13 | 1.80E-10  |
| INTERPRO        | Immunoglobulin-like                                     |  38 | 1.40E-11 | 2.10E-09  |
| UP_SEQ_FEATURE  | domain:Ig-like C2-type 1                                |  22 | 2.00E-10 | 3.60E-08  |
| UP_SEQ_FEATURE  | domain:Ig-like C2-type 2                                |  22 | 2.20E-10 | 3.40E-08  |
| UP_SEQ_FEATURE  | domain:Ig-like V-type                                   |  17 | 3.10E-09 | 3.70E-07  |
| INTERPRO        | Immunoglobulin V-set                                    |  19 | 3.90E-06 | 4.70E-04  |
| UP_SEQ_FEATURE  | domain:Ig-like C2-type 3                                |  13 | 5.50E-06 | 5.40E-04  |
| UP_SEQ_FEATURE  | domain:Ig-like C2-type 4                                |  10 | 1.90E-05 | 1.40E-03  |
| Cluster 4       | Enrichment Score: 9.62                                  | Number of Genes                                                                          | P_Value  | Benjamini |
| GOTERM_BP_FAT   | regulation of cytokine production                       |  23 | 3.00E-11 | 1.00E-08  |
| GOTERM_BP_FAT   | positive regulation of cytokine production              |  17 | 5.00E-11 | 1.40E-08  |
| GOTERM_BP_FAT   | positive regulation of multicellular organismal process |  23 | 9.30E-09 | 1.70E-06  |
